# 1 **The evolutionary potential of the influenza A virus hemagglutinin is highly** 2 **constrained by intersegment epistasis**

3  
4 Tongyu Liu<sup>1</sup>, Yiquan Wang<sup>2</sup>, Timothy J C Tan<sup>3</sup>, Nicholas C Wu<sup>2,3,4,5\*</sup>, Christopher B  
5 Brooke<sup>1, 4\*</sup>

6  
7 <sup>1</sup>Department of Microbiology, University of Illinois at Urbana-Champaign, Urbana,  
8 Illinois, USA

9 <sup>2</sup>Department of Biochemistry, University of Illinois at Urbana-Champaign, Urbana,  
10 Urbana, Illinois, USA

11 <sup>3</sup>Center for Biophysics and Quantitative Biology, University of Illinois at Urbana-  
12 Champaign, Urbana, Illinois, USA

13 <sup>4</sup>Carl R. Woese Institute for Genomic Biology, University of Illinois at Urbana-  
14 Champaign, Urbana, Illinois, USA

15 <sup>5</sup>Carle Illinois College of Medicine, University of Illinois at Urbana-Champaign, Urbana,  
16 Illinois, USA

17 \* Corresponding authors (nicwu@illinois.edu, cbrooke@illinois.edu)

## 18 **Abstract**

19  
20 The ongoing antigenic evolution of the influenza A virus (IAV) hemagglutinin (HA) gene  
21 limits efforts to effectively control the spread of the virus in the human population  
22 through vaccination. The factors that influence and constrain the evolutionary potential  
23 of the HA gene remain poorly understood. Efforts to understand the mechanisms that  
24 govern HA antigenic evolution typically examine the HA gene in isolation and ignore the  
25 importance of balancing HA receptor-binding activities with the receptor-destroying  
26 activities of the viral neuraminidase (NA) for maintaining viral fitness. We hypothesized  
27 that the need to maintain functional balance with NA significantly constrains the  
28 evolutionary potential of the HA gene. We used deep mutational scanning to show that  
29 variation in NA activity significantly reshapes the HA fitness landscape by modulating  
30 the overall mutational robustness of the HA protein. Consistent with this, we observe  
31 that different NA backgrounds support the emergence of distinct repertoires of HA  
32 escape variants under neutralizing antibody pressure. Our results reveal a critical role  
33 for intersegment epistatic interactions in shaping the evolutionary potential of the HA  
34 gene.

## 35 **Introduction**

36  
37 Seasonal influenza A viruses (IAV) impose enormous public health (Paget et al., 2019)  
38 and economic burdens (Putri et al., 2018) across the globe on a yearly basis, despite  
39 the availability of licensed vaccines. The viral hemagglutinin (HA) glycoprotein mediates  
40 cell binding and entry and represents the primary target of protective neutralizing  
41 antibodies. The persistence of seasonal IAV lineages in the human population depends  
42 upon the continual accumulation of antigenically significant substitutions that facilitate  
43 evasion of humoral immunity elicited by prior infection or vaccination. This process,  
44 known colloquially as “antigenic drift”, necessitates yearly updating of seasonal

45 influenza virus vaccines (Carrat and Flahault, 2007; Petrova and Russell, 2018;  
46 Yewdell, 2011).

47  
48 The antigenic evolution of influenza viruses at the epidemiological scale appears highly  
49 constrained, as new antigenic variants typically only emerge every few years despite  
50 the high mutation rate of the virus (Brooke, 2017; Pauly et al., 2017; Petrova and  
51 Russell, 2018). Further, only a tiny fraction of potential escape variants generally  
52 emerge under immune selection, likely because most substitutions capable of reducing  
53 antibody binding avidity have deleterious pleotropic effects on HA function that offset  
54 their fitness benefits (Doud et al., 2017; Koel et al., 2013; Kosik et al., 2018). Defining  
55 the specific constraints that govern the emergence of antigenic variants is critical both  
56 for the design of next-generation vaccines that elicit more escape-resistant immune  
57 responses and for improving our ability to predict future evolutionary trends.

58  
59 IAV encodes two primary surface glycoproteins: HA and neuraminidase (NA) that are  
60 irregularly distributed across the viral envelope (Harris et al., 2006; Michael Vahey and  
61 Fletcher Correspondence, 2019; Vahey and Fletcher, 2019; Wasilewski et al., 2012).  
62 HA and NA perform opposing functions during the viral life cycle: HA binds to sialic acid  
63 linkages to facilitate cell entry while NA typically cleaves sialic acid linkages to facilitate  
64 virion release (Kosik and Yewdell, 2019). Balancing these opposing functions is critical  
65 for maintaining viral fitness (Brooke et al., 2014; Gaymard et al., 2016; Kosik and  
66 Yewdell, 2019; Mitnaul et al., 2000; de Vries et al., 2020; Wagner et al., 2002; Xu et al.,  
67 2012a). Consistent with this, escape substitutions that emerge in HA are often  
68 associated with compensatory substitutions in NA that alter NA activity levels (Das et  
69 al., 2013; Hensley et al., 2011). While the importance of HA-NA balance is well-  
70 established, the implications of this critical functional relationship with NA for the  
71 evolutionary potential of HA have not been thoroughly examined. Here, we examine  
72 how phenotypic variation in NA can reshape the evolutionary landscape available to the  
73 HA gene, resulting in divergent pathways of antigenic escape.

74

## 75 **Results**

### 76 **Changes in NA activity reshape the HA fitness landscape**

77 Based on the importance of HA/NA functional balance for maintaining viral fitness, we  
78 hypothesized that phenotypic variation in NA would alter patterns of mutational  
79 tolerance of the HA protein. To test this, we generated two recombinant A/Puerto  
80 Rico/8/1934 (rPR8) viruses that were identical to wild type except for single amino acid  
81 substitutions in the NA protein that have been previously demonstrated to reduce NA  
82 activity. NA:K253R was first identified as a compensatory mutation that emerged  
83 following anti-HA antibody selection (Hensley et al., 2011), and NA:H274Y is a well-  
84 characterized NA inhibitor-resistance substitution (Bloom et al., 2010; Ives et al., 2002).  
85 As expected, NA:K253R reduced virion-associated NA activity ~75% comparing with  
86 WT (**Fig 1A**). We further confirmed that NA:K253R reduced NA protein trafficking to the  
87 plasma membrane in infected Madin-Darby canine kidney (MDCK) cells (**Fig 1B**), and  
88 decreased the NA protein content of purified virions (**Fig 1C**). These data indicate that

89 NA:K253R likely reduces virion-associated NA activity by reducing the amount of  
90 incorporated NA protein rather than by altering NA enzymatic activity. We failed to  
91 reproduce the previously reported adverse effects of NA:H274Y on NA activity (**Fig 1**).  
92 This inconsistency could be due to the different virus background used in this study. As  
93 our assays may fail to capture subtle but biologically significant effects of NA:H274Y on  
94 NA function in our system, we included it along with NA:K253R in subsequent  
95 experiments.  
96

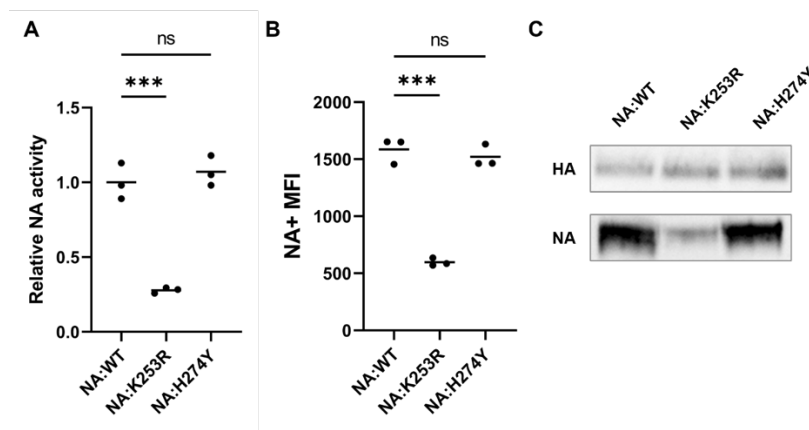

97  
98

99 **Figure 1: NA:K253R reduces NA surface expression and virion-associated NA**  
100 **activity. (A)** The normalized  $V_{max}$  of NA activities from three independently generated  
101 virus stocks for each NA variant measured by MUNANA assay. The results were  
102 normalized by NP genome equivalents as determined by RT-qPCR. \*\*\* indicates  $p <$   
103  $0.01$  and ns indicates  $p > 0.05$ , based on  $t$  tests. **(B)** NA surface expression levels  
104 represented by mean fluorescence intensities (MFI) of NA positive cells at 16 hpi as  
105 measured by flow cytometry on MDCK cells infected at  $MOI = 0.05$  TCID<sub>50</sub>/cell. \*\*\*  
106 indicates  $p < 0.01$  and ns indicates  $p > 0.05$ , based on  $t$  tests. **(C)** Western blotting for  
107 HA and NA protein in purified virions. The input amounts of purified virions in the  
108 western blot were normalized based on the mean gray value of HA signal in a previous  
109 Western blot of the same samples.  
110

111 We quantified the effects of NA:H274Y and NA:K253R on the mutational tolerance of  
112 the HA1 subunit of HA using deep mutational scanning (DMS) (Doud and Bloom, 2016;  
113 Fowler and Fields, 2014; Lee et al., 2018; Wu et al., 2014). We used a degenerate  
114 primer-based PCR approach to generate a reverse genetics plasmid library in which  
115 each codon in the HA1 domain was hyper-mutagenized to ensure sufficient  
116 representation of all possible amino acid substitutions as described previously (Doud  
117 and Bloom, 2016; Wang et al., 2021; Wu et al., 2014). We confirmed the presence of  
118 sufficient coding diversity within our plasmid library by deep sequencing (**Fig S1**). For  
119 each NA genotype (WT, NA:H274Y, and NA:K253R), we rescued three independent  
120 recombinant virus populations encoding the mutagenized HA1 domain (HA1dms) and a  
121 WT PR8 backbone using the established IAV reverse genetics transfection system. We  
122 passaged each population once in MDCK cells for 24 hours at a starting multiplicity of  
123 infection (MOI) of 0.05 TCID<sub>50</sub>/cell to minimize cellular co-infection and thus maintain

124 genotype-phenotype linkages. We then performed barcoded sub-amplicon deep  
125 sequencing on each post-passage virus population, along with the mutagenized HA  
126 plasmid library used to generate the viruses.

127  
128 For every possible amino acid substitution in HA1, we calculated an enrichment factor  
129 by dividing its post-passage frequency by its frequency in the input plasmid library. We  
130 then calculated normalized relative fitness scores for each missense substitution in HA1  
131 by normalizing based on the enrichment factor distributions of nonsense and  
132 synonymous substitutions. In brief, we assumed all nonsense substitutions would be  
133 lethal, regardless of genetic background and set their mean relative fitness values at 0  
134 for each experimental replicate. Similarly, we assumed all synonymous substitutions  
135 would be neutral and set their mean relative fitness values at 1 for each experimental  
136 replicate. The pairwise correlation coefficients of fitness scores for specific substitutions  
137 between experimental replicates ranged from 0.665 to 0.812, indicating that our fitness  
138 effect measurements were highly reproducible (**Fig 2A, S2**).

139

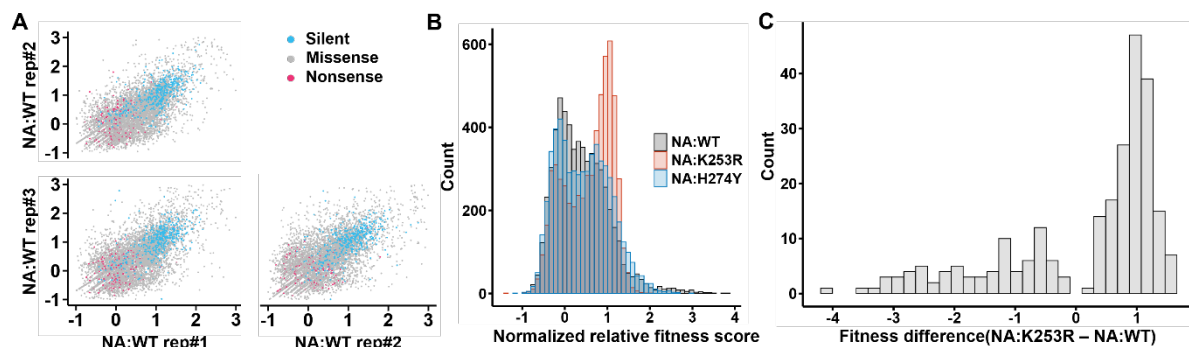

140

141

142 **Figure 2: Variation in NA backgrounds affects the global fitness landscape of HA.**  
143 **(A)** Correlations of normalized relative fitness scores across NA:WT replicate  
144 populations. Each dot represents the normalized relative fitness score of a specific  
145 substitution in the two indicated samples. Silent, missense, and nonsense substitutions  
146 are colored as indicated in the legend. **(B)** The distributions of normalized relative  
147 fitness scores of all missense substitutions in the indicated genetic backgrounds. Values  
148 are averaged across three replicates for each genotype. **(C)** The distribution of  
149 differences in missense substitution fitness scores between NA:K253R and NA:WT.  
150 Only shows substitutions for which *t* test on differences between genotypes yielded  $p <$   
151  $0.01$ .

152

153 A large majority of missense substitutions in the rPR8-WT background had normalized  
154 fitness scores of  $<1$ , with the overall peak of fitness effects near 0, while only a tiny  
155 minority had fitness scores  $>1$ , as expected given that this virus is fairly well adapted to  
156 this host system (**Fig 2B**). This distribution is also consistent with previous studies  
157 across multiple virus families (including IAV) that indicate the vast majority of mutations  
158 have deleterious effects on relative fitness (Sanjuan, 2010; Sanjuan et al., 2004; Visher  
159 et al., 2016; Wu et al., 2014). Surprisingly, the normalized distribution of fitness effects

160 (DFE) for rPR8-NA:K253R was shifted significantly compared with WT (**Fig 2B,C**), with  
161 a smaller peak of lethal or near-lethal substitutions with fitness scores of  $\sim 0$  and a large  
162 increase in substitutions with fitness scores of  $\sim 1$ , indicating neutral or nearly-neutral  
163 effects on relative fitness. Substitutions at 150 out of 325 HA1 residues in rPR8-  
164 NA:K253R exhibited significant shifts ( $p < 0.01$ , t test) in fitness scores compared with  
165 rPR8-WT. Finally, the DFE for rPR8-NA:H274Y was also shifted but to a lesser extent,  
166 consistent with the minimal effect of this substitution on NA function (**Fig S3**).  
167 Altogether, these data suggest that phenotypic variation in NA can have widely  
168 distributed effects on the mutational tolerance of the HA gene.

169

### 170 **Epistatic effects of NA on HA mutational fitness effects are enriched near the HA** 171 **receptor binding site**

172 To better understand how phenotypic variation in NA can affect mutational tolerance at  
173 specific residues, we calculated the differences in normalized fitness scores of  
174 individual HA1 substitutions between rPR8-WT and the two NA variants (**Fig 3A, S4**). In  
175 this analysis, positive difference values for individual substitutions indicate higher fitness  
176 in the NA variant background relative to WT while negative values indicate a higher  
177 fitness in the rPR8-WT background. Negative fitness score differentials were clearly  
178 enriched in a subset of residues, many of which are located near the receptor binding  
179 site (RBS).

180

181 Since rPR8-NA:K253R and rPR8-WT exhibited the most profound difference in NA  
182 activity, we focused on them for the following analyses. To define how NA influences  
183 mutational tolerance across the HA structure, we calculated per-residue mean of  
184 absolute difference (MAD) values (quantifies effects on overall mutational tolerance) of  
185 every residue in HA1 and plotted these values on the HA structure (**Fig 3B**). Key  
186 residues involved in receptor specificity, including E190 and D225, showed dramatically  
187 higher MAD values, indicating that epistatic interactions with NA are enriched in  
188 residues involved in receptor binding. Overall, NA-dependent fitness differences were  
189 significantly lower for residues associated with the RBS compared with those elsewhere  
190 in HA1 ( $p = 0.003739$ , unpaired two-samples Wilcoxon test) (**Fig 3C**). In other words,  
191 substitutions in the RBS tended to have a higher fitness in rPR8-WT than rPR8-  
192 NA:K253R, whereas the substitutions in HA1 non-RBS regions showed the reverse.

193

194 From the heatmap in **Fig 3A**, we observed that the positively charged amino acids  
195 arginine and lysine exhibited distinct mutational fitness effect patterns from other amino  
196 acids. We hypothesized that substitutions that result in net positive charge changes may  
197 be more tolerated within the WT NA background as these changes would likely enhance  
198 binding to the negatively charged cell surface via electrostatic interactions. As expected,  
199 negative charge changes on HA surface determined by GetArea (Fraczkiewicz and  
200 Braun) were more tolerated in rPR8-NA:K253R while positive charge changes had  
201 higher fitness in rPR8-WT (**Fig 3D**). Altogether, these observations indicate that the  
202 epistatic effects of NA phenotype on HA mutational tolerance are most pronounced for  
203 residues involved in receptor binding and cell adhesion.



204

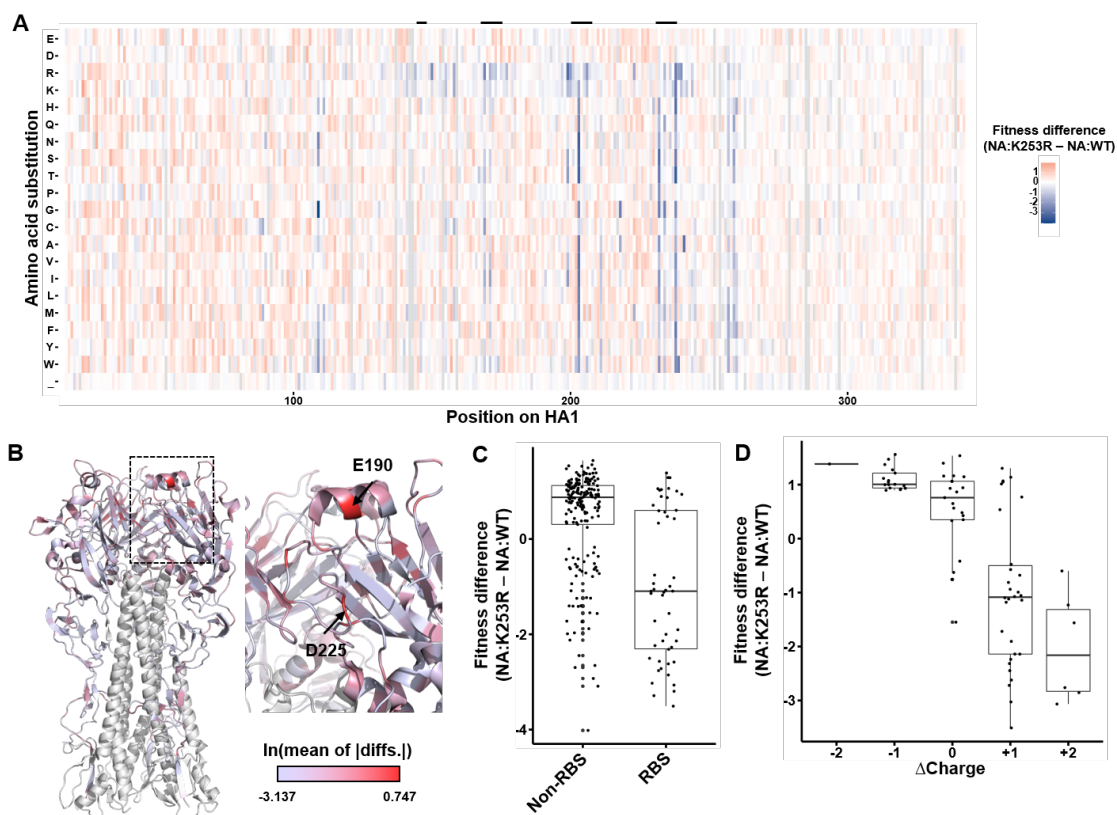

205

206

207

208

209

210

211

212

213

214

215

216

217

218

219

220

221

222

223

224

225

226

**Figure 3: Epistatic effects of NA on HA mutational tolerance are concentrated in residues associated with receptor binding. (A)** Normalized relative fitness score differences between NA:WT and NA:K253R for each substitution at each residue in HA1 as measured through DMS. Each value was generated by subtracting the mean fitness score of 3 replicates for each genotype. Gray indicates that the mutation had insufficient coverage in the plasmid library. Residue numbering based on the initiating methionine. Secondary structures forming the receptor binding site (130 loop, 150 loop, 190 helix, 220 loop) are indicated by the black bars above. **(B)** HA structure (PDB:1RU7) showing all HA1 residues colored by the natural log values of per-residue mean of absolute differences (MAD) of all substitutions between NA:WT and NA:K253R. HA2 domain colored in white. **(C)** Normalized relative fitness score differences between residues in HA1 associated with the receptor binding site versus those that are not (only showing substitutions with  $p < 0.01$  by  $t$  test for comparison between NA:WT and NA:K253R). **(D)** Correlation between normalized relative fitness score differences and charge changes on surface (only showing substitutions with  $p < 0.01$  by  $t$  test for comparison between NA:WT and NA:K253R).

### HA takes distinct mutational pathways to escape neutralizing antibody pressure depending on NA genotype

Our DMS data clearly demonstrated that variation in NA activity can significantly alter the mutational tolerance of the HA1 domain, particularly at residues surrounding the

227 RBS that are known to be highly antigenically significant (Caton et al., 1982; Koel et al.,  
228 2013). Based on this, we hypothesized that different NA backgrounds would support the  
229 emergence of distinct repertoires of escape variants under neutralizing antibody  
230 selection. To test this, we performed *in vitro* selection experiments using the Sb epitope-  
231 specific neutralizing monoclonal antibody (mAb) H36-26 and the three recombinant  
232 viruses detailed above (rPR8-WT, rPR8-NA:K253R, and rPR8-NA:H274Y). Importantly,  
233 all three viruses have identical HA sequences. To minimize variation introduced by  
234 bottlenecks during virus rescue, we pooled three independent rescues of each virus to  
235 generate the parental virus populations for selection experiments. We infected MDCK  
236 cells with  $10^7$  TCID<sub>50</sub> of each virus in sextuplicate in the presence of H36-26 at a  
237 concentration where neutralization is saturated under these conditions (**Fig S4**). We  
238 passaged viral populations twice (16 hours each passage) in the presence of H36-26 to  
239 reach sufficient titers for sequencing ( $>10^4$  TCID<sub>50</sub>/mL). We then deep sequenced post-  
240 selection viral populations and identified single nucleotide variants (SNVs) that emerged  
241 above background using DeepSNV (Gerstung et al., 2012, 2014).

242  
243 Distinct repertoires of escape substitutions emerged in mutant and WT NA  
244 backgrounds. In the WT background, HA:E156K emerged to high frequency ( $>60\%$ ) in  
245 6/6 replicate populations, while K189Q was also observed at frequencies between 2%  
246 and 20% in 5/6 populations (**Fig 4A**). In contrast, neither E156K nor K189Q were  
247 observed above background in either rPR8-NA:K253R or rPR8-NA:H274Y. Instead,  
248 Q196K/R substitutions emerged to high frequency in 5/5 (one of the replicates in rPR8-  
249 NA:K253R failed to grow) or 6/6 replicates for rPR8-NA:K253R and rPR8-NA:H274Y,  
250 respectively. Q196R was present above background in 2/6 WT populations while  
251 Q196K was not observed. Both E156 and Q189 are located within the canonical Sb  
252 epitope (**Fig 4B**). These results are consistent with the DMS data, where HA:E156K  
253 showed higher relative fitness than HA:Q196K in the rPR8-WT background while  
254 HA:Q196R showed higher relative fitness than HA:E156K in the rPR8-NA:K253R  
255 background (**Fig S6**).

256  
257 We hypothesized that viruses with lower relative NA activity would support the  
258 emergence of HA escape variants with lower receptor binding avidity compared with  
259 viruses with higher NA activity. We compared the receptor binding avidities of  
260 HA:E156K (predominant variant that emerged exclusively in the rPR8-WT background)  
261 and HA:Q196K (predominant variant that emerged exclusively in the NA mutant  
262 backgrounds) using bio-layer interferometry (BLI). As expected (Hensley et al., 2009),  
263 HA:E156K exhibited a higher receptor binding on-rate compared with HA:Q169K (**Fig**  
264 **S7**).

265  
266 To test the generality of this observation, we performed a similar selection experiment  
267 using the Ca1-specific mAb H17-L2. Again, we observed distinct repertoires of escape  
268 variants in WT versus NA mutant backgrounds (**Fig 4C**). G173W, S207P/L and G240R  
269 were the dominant substitutions that emerged above background for rPR8-NA:WT  
270 viruses but were only sporadically observed above background in the rPR8-NA:K253R

271 and rPR8-NA:H274Y backgrounds. Instead, I93T, V169M, and G240E were exclusively  
 272 identified within the rPR8-NA:K253R and/or rPR8-NA:H274Y backgrounds. All these  
 273 residues are located within or adjacent to the canonical Ca1 epitope (**Fig 4D**). Our  
 274 results clearly demonstrate that different NA genotypes can reproducibly foster the  
 275 emergence of distinct repertoires of HA escape variants under neutralizing antibody  
 276 selection.  
 277

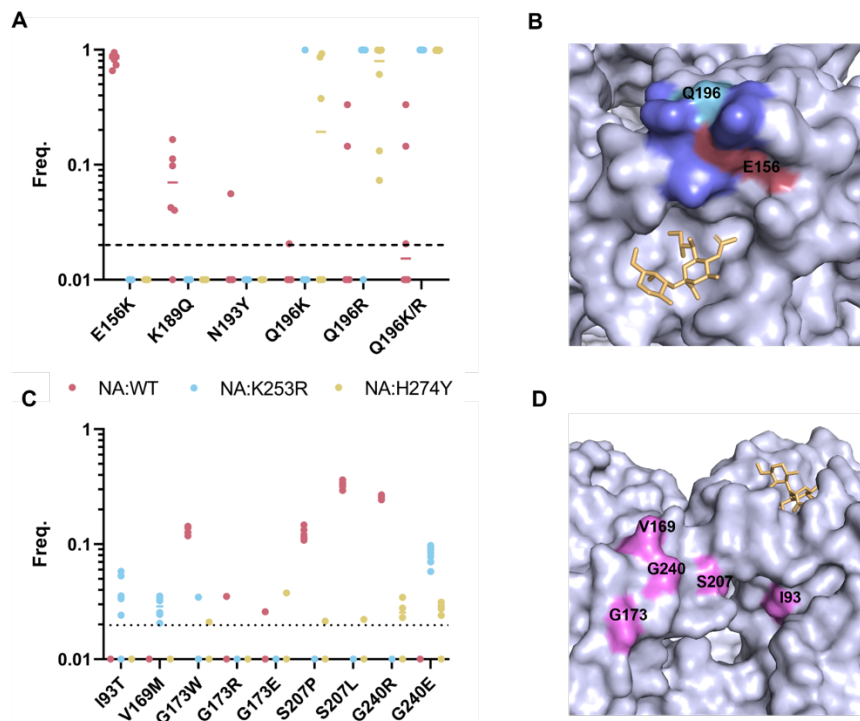

278  
 279  
 280 **Figure 4: Different NA backgrounds support distinct mutational pathways to**  
 281 **escape from neutralizing anti-HA antibodies. (A)** Six independent populations of  
 282 PR8-WT, PR8-NA:K239R, and PR8-NA:H274Y were passaged twice in MDCK cells in  
 283 the presence of a neutralizing concentration of the anti-HA mAb H36-26, deep  
 284 sequenced and analyzed via deepSNV(Gerstung et al., 2012). Frequencies of all HA  
 285 amino acid substitutions detected at frequencies above the 2% frequency threshold  
 286 (dashed line) across all replicates. Data from no mAb controls not shown but had no  
 287 variants above 2%. Each dot represents the frequency in a single replicate. **(B)** The  
 288 position of sialic acid receptor (yellow), E156 (rose), Q196 (cyan), and other Sb epitope  
 289 residues (Caton et al., 1982) (purple) on the HA structure (PDB: 3UBQ (Xu et al.,  
 290 2012b)). **(C)** The frequency of all HA amino acid substitutions detected under H17-L2  
 291 selection. Same experimental design as in (A) but using the Ca1-specific mAb H17L2.  
 292 No mAb controls not shown but had no variants above 2% frequency (indicated by the  
 293 dashed line). **(D)** The position of H17-L2 escape substitutions and the canonical Ca1  
 294 epitope in pink and sialic acid receptor (yellow) (Caton et al., 1982) on HA structure  
 295 (PDB:3UBQ (Xu et al., 2012b)).  
 296



## 297 **Discussion**

298 The specific factors that govern the evolutionary potential of the IAV HA gene remain  
299 poorly understood. Our results reveal how phenotypic variation in NA can profoundly  
300 reshape the fitness landscape available to the HA gene, thus determining its potential  
301 for future adaptation. The importance of balancing the opposing activities of the HA and  
302 NA glycoproteins for maximizing viral fitness is well established (Kosik and Yewdell,  
303 2019). The importance of epistatic networks within HA has also been demonstrated to  
304 influence antigenic evolution (Kryazhimskiy et al., 2011; Wu et al., 2018). Here, we  
305 extend these concepts by demonstrating how intersegment epistasis arising from the  
306 intimate functional relationship between HA and NA significantly constrains the  
307 evolutionary potential of HA.

308  
309 Given the typical number of contact residues involved in neutralizing antibody binding,  
310 numerous substitutions across multiple residues could potentially mediate escape. Most  
311 of these potential escape substitutions have deleterious pleiotropic effects on HA  
312 function that severely limit their overall viability and emergence potential (Doud et al.,  
313 2017; Kosik et al., 2018; Wu and Wilson, 2017). Our data indicate that as the HA genes  
314 of seasonal influenza viruses evolve to escape humoral immune pressure, the specific  
315 mutational pathways taken will be highly contingent upon the associated NA gene.  
316 Given that multiple N1 and N2 clades are often co-circulating, our results strongly  
317 suggest that the evolution of the HA gene cannot be viewed in isolation and that efforts  
318 to predict the evolutionary trajectories of seasonal IAVs must account for the influence  
319 of the associated NA segment.

320  
321 Based on our overall hypothesis, we expected to observe a strong epistatic relationship  
322 between NA and the HA residues involved in receptor binding. Specifically, we expected  
323 substitutions that increase HA receptor binding avidity to have higher relative fitness in  
324 the context of NA:WT compared with NA:K253R, while substitutions that reduce  
325 receptor binding avidity to have higher relative fitness in the context of NA:K253R.  
326 Consistent with this, we observed that the fitness effects of substitutions associated with  
327 the RBS were highly sensitive to the NA background. This pattern was also observed in  
328 the context of neutralizing mAb escape, where HA:E156K, an escape substitution that  
329 significantly increases receptor binding avidity, dominated in the context of NA:WT but  
330 never emerged above background in NA:K253R. Instead, NA:K253R supported the  
331 emergence of an alternative escape substitution, HA:Q196K, that was associated with a  
332 less pronounced increase in receptor avidity.

333  
334 Surprisingly, we discovered that the mutational tolerance profiles of numerous residues  
335 distal from the RBS were also significantly affected by the NA background. Epistatic  
336 effects of NA on these residues may still be largely driven by HA/NA balance issues,  
337 however, as numerous mechanisms can influence the ability of HA to facilitate receptor  
338 binding. These effects could involve surface charge changes that modulate electrostatic  
339 interactions between virions and the negatively charged cell surface. Another possibility  
340 is that destabilizing substitutions in HA (that potentially decrease proper folding,

341 trafficking, virion incorporation, and/or receptor binding) may be better tolerated in  
342 genetic backgrounds with lower relative NA activity.

343

344 Our data demonstrate how variation in NA activity can modulate the overall mutational  
345 robustness of HA beyond the cluster of residues involved in receptor binding. We found  
346 that NA:K253R was associated with a positive overall shift in the mean fitness effects  
347 distribution for HA1, indicating that the relative fitness costs of a large number of  
348 substitutions were decreased in the context of reduced NA activity. We hypothesize that  
349 this effect is due to the functionally opposed primary activities of HA and NA. Viruses  
350 with lower relative levels of NA activity will have weaker functional constraints on HA, as  
351 they will better tolerate decreases in HA receptor binding avidity associated with amino  
352 acid substitutions. In this way, the functional balance of HA and NA may provide a  
353 simple system for studying how intergenic epistatic interactions can influence the  
354 mutational robustness of a viral protein.

355

356 The variability in the overall mutational robustness of the HA gene as a function of NA  
357 phenotype has substantial broader implications for IAV evolution. Mutational robustness  
358 has been hypothesized to facilitate the adaptive potential of proteins (and by extension,  
359 viral populations) under some conditions (Bloom et al., 2006; Draghi et al., 2010; Elena,  
360 2012; Lauring et al., 2013; McBride et al., 2008; de Visser et al., 2003). By buffering  
361 mutational fitness effects, increases in robustness can promote the accumulation of  
362 genetic variants that may confer enhanced fitness or rescue in changing environmental  
363 conditions. In an extreme example, a zoonotic IAV population encoding a more  
364 mutationally robust HA gene would be more likely to accumulate substitutions that could  
365 facilitate successful cross-species transmission. Alternatively, a recent study  
366 demonstrated that increasing the robustness of a bacteriophage protein by increasing  
367 its thermostability actually decreased the potential of the virus to evolve to expand its  
368 host range (Strobel et al., 2022). In the context of IAV antigenic evolution, deleterious  
369 mutation load has been hypothesized to govern the potential for antigenic escape  
370 variants to emerge at the host population level, suggesting another mechanism by  
371 which variation in HA mutational robustness could influence antigenic drift (Koelle and  
372 Rasmussen, 2015). Altogether, our results suggest that variation in NA may have  
373 profound, if difficult to predict, effects on the evolvability of the HA gene.

374

375 In conclusion, our results demonstrate that epistatic interactions between HA and NA  
376 play a major role in shaping the fitness landscape of the HA gene (and almost certainly  
377 the NA gene as well) and in determining the most likely genetic pathways of antigenic  
378 evolution. Thus, the need to maintain functional balance between HA and NA activities  
379 imposes a significant constraint on the evolutionary potential of influenza viruses and  
380 should be considered in efforts to predict future evolutionary trajectories.

381

## 382 **Methods**

### 383 **Cells and viruses**

384 Madin-Darby canine kidney (MDCK) and human embryonic kidney HEK293T (293T)  
385 cells were passaged and maintained in Minimum Essential Medium (MEM + GlutaMAX,  
386 ThermoFisher Scientific) with 8.3% fetal bovine serum (FBS, Avantor Seradigm  
387 Premium Grade Fetal Bovine Serum) in 37°C and 5% CO<sub>2</sub>. MDCK cells and 293T cells  
388 were gifts of Dr. Jonathan Yewdell and Dr. Joanna Shisler, respectively.

389  
390 A/Puerto Rico/8/1934 (PR8) and the specific PR8 mutants (generated by PCR  
391 mutagenesis) used in the study were generated via standard reverse genetics. In brief,  
392 ~60% confluent 293T cells in 6-well plate were transfected with 500 ng of each segment  
393 cloned in the pDZ reverse genetics vector (jetPRIME, Polyplus Transfection). After 24  
394 hours, the medium was replaced by the infection medium (MEM + 1 µg/mL TPCK-  
395 treated trypsin + 1 mM HEPES and 50 µg/mL gentamicin). Supernatants from  
396 transfected cells were collected at 48 hours post transfection and used to infect MDCK  
397 cells in 6-well plate to generate the seed stock. Seed stocks were collected at 48 hours  
398 post infection (hpi) or upon development of cytopathic effect (CPE), which ever came  
399 first. Working stocks were generated by infecting MDCK cells in T75 or T175 flask with  
400 seed stock at an MOI of 0.0001 TCID<sub>50</sub>/cell and collecting the supernatant at 48 hpi or  
401 when early signs of CPE were observed, which ever came first. Virus stocks were  
402 tittered by standard TCID<sub>50</sub> assay. The plasmids were generously provided by Dr.  
403 Jonathan Yewdell.

404  
405 The secondary structures forming the receptor binding site are defined as: T132-V135  
406 (130 loop), T155-P162 (150 loop), N187-Y195 (190 helix), A218-D225 (220 loop)  
407 (Tzarum et al., 2017; Wu et al., 2013). The residue numbering of HA and NA is based  
408 on alignment to structural numbering of H3N2 (strain A/Hong Kong/1/1968 H3N2  
409 (Brown et al., 2001), UniProt: Q91MA7, Q91MA2 for HA and NA) unless specified  
410 otherwise.

#### 411 412 **MUNANA assay**

413 The substrate 2'-(4-Methylumbelliferyl)- $\alpha$ -D-N-acetylneuraminic acid sodium salt  
414 hydrate (MUNANA, Sigma-Aldrich) was dissolve in NA buffer (33 mM MES, 4 mM  
415 CaCl<sub>2</sub> within 1X PBS, pH = 6.5) and aliquoted. A black 96-well half-well flat bottom  
416 plate, the plate reader, NA buffer and the substrate was preheated to 37°C. 25 µL of  
417 virus sample (diluted in NA buffer) was mixed with 20 µL of the substrate (200 µM) and  
418 taken to the plate reader to measure the fluorescent kinetic (excitation wavelength =  
419 365nm, emission wavelength = 450 nm) for 45 min.  $V_{max}$  values were estimated based  
420 on data collected after the first 10 min of the assay. The results were normalized based  
421 on the genome equivalent of NP segment determined by RT-qPCR.

#### 422 423 **Cellular surface staining of NA**

424 MDCK cells were infected with MOI = 0.05 based on the TCID<sub>50</sub> titer of the viruses.  
425 MEM + 8.3%FBS was added on the cells after infection for 1 hour and replaced by  
426 NH<sub>4</sub>Cl medium (MEM, 50 mM HEPES, 20 mM NH<sub>4</sub>Cl, pH = 7.2) to block secondary  
427 infection. Cells were collected 16 hpi and stained with NA antibody (NA2-1C1-AF488,

428 1:1600) without permeabilization and run on a BD FACSAria Flow Cytometer. The NA  
429 positive cells were gated based on the no infection controls and the expression level  
430 were measured by the mean fluorescence intensity.

431

### 432 **Western blot of HA and NA**

433 The virus stocks used for western blot were purified by ultra-centrifugation. Briefly, 10  
434 mL of 20% sucrose with 30 mL of the virus stock was centrifuged at 27000 rpm, 4°C for  
435 2 hours. The pellet was dissolved in PBS overnight. The product was then added on the  
436 top of a cushion of 15% sucrose and 60% sucrose and centrifuged. The virus band was  
437 collected after and washed by PBS. The purified viruses were heated at 98°C for 2 min,  
438 loaded on Bis-Tris protein gel (Bolt 4-12% Bis-Tris Plus, invitrogen), run on 150 V for 45  
439 min and then transferred to PVDF membrane (iBlot2 PVDF Mini Stacks, invitrogen). The  
440 membrane was then stained with HA antibody (RA5-22, obtained through BEI  
441 Resources) and rabbit anti-NA polyclonal antibody (gift of Dr. Jonathan Yewdell).

442

### 443 **Deep mutation scanning of HA1**

444 To generate all possible amino acid substitutions within HA1, NNK was introduced into  
445 each codon of the interest (D18-S342, H1 numbering from the first amino acid residue)  
446 by overlapping PCR (Phusion High-Fidelity DNA Polymerase, ThermoFisher Scientific)  
447 to generate full-length HA amplicons. NNK-mutagenized HA amplicons were then  
448 cloned into pDZ vector by T4 ligation (T4 DNA Ligase, New England BioLabs Inc.). The  
449 ligation product was then used to transform DH10B competent cells (MegaX DH10B T1,  
450 Invitrogen) and yield  $9.8 \times 10^5$  colonies (150X coverage of all substitutions) in total from  
451 two transformation reaction. The colonies were harvested and the plasmids were  
452 extracted by Midi prep (HiSpeed Plasmid Midi Kit, QIAGEN).

453

454 To rescue the viruses,  $1.25 \times 10^7$  293T cells and  $6 \times 10^6$  MDCK cells were mixed and  
455 seeded per T175 flask in 25 mL of cell growth medium (MEM + 8.3% FBS). The next  
456 day, 7 µg each of the 8 reverse genetics plasmids was mixed with 112 µL of jetPRIME  
457 reagent (Polyplus Transfection) and 1.2 mL jetPRIME buffer (Polyplus Transfection) and  
458 this mixture was added to the medium. After 24 hours of transfection, the medium was  
459 removed, cells were washed with PBS, and 20 mL of infection medium was added.  
460 Supernatants were collected 72 hours post transfection. Each virus was passaged for  
461 16 hours in present of same concentration of the antibody once in a T175 flask of  
462 confluent MDCK cells at a starting MOI of 0.05 TCID<sub>50</sub>/cell.

463

464 Viral RNA was extracted (QIAamp Viral RNA Kits, QIAGEN) and used to generate the  
465 cDNA (SuperScript III, ThermoFisher Scientific). For RT reaction, 11.8 µL of viral RNA  
466 was mixed with 1 µL random hexamer (125 ng/µL) and incubated at 65°C for 5 min for  
467 primer binding. The mixture was then added to be a 20 µL reaction and incubate at  
468 50°C for 1 hour to generate cDNA (SuperScript III, ThermoFisher Scientific). The HA1  
469 sequence was divided into three fragments for sequencing. Seven Ns were added into  
470 the primers as the barcode for barcoded-subamplicon sequencing during the first round  
471 PCR (PrimeSTAR Max DNA Polymerase, Takara Bio, PCR condition was set according

472 to the manufacturer). Equal amount of the products from the three fragments of each  
473 sample were purified (PureLink Quick Gel Extraction Kit, ThermoFisher Scientific) and  
474 mixed.  $1.3 \times 10^6$  copies of the PCR product from the mixture above were added into the  
475 second round PCR (KOD Hot Start DNA Polymerase, Novagen) to add the adapter for  
476 sequencing. The condition of the second round PCR was set according to the  
477 manufacture with an annealing temperature of 58°C for 25 cycles. The second round  
478 PCR products were then purified and submitted for sequencing on an SP line for 251  
479 cycles from both ends of the fragments on a NovaSeq 6000 (250 nt, paired-end reads).

480

#### 481 **Analysis of deep mutational scanning data**

482 Sequencing data were processed as described before (Wang et al., 2021) to generate  
483 read counts for each amino acid substitution. The adaptors were trimmed, the FASTQ  
484 files were generated and demultiplexed with the bcl2fastq v2.20 Conversion Software  
485 (Illumina). Sequencing data was obtained in FASTQ format and analyzed using a  
486 custom Python snakemake pipeline (Mölder et al., 2021). First, UMIs were merged  
487 using python script with parameters: NNNNNNN 0.8 2, to obtain 5'-end paired UMIs  
488 with pattern 'NNNNNNN', at least two sequences with same UMIs, of which at least  
489 80% are consensus sequence. Subsequently, primer sequences were trimmed using  
490 cutadapt (Martin, 2011), and then sequencing reads were renamed based on amplicon  
491 primer. Before variant calling and the fitness calculations, cleaned paired-end reads  
492 were merged by FLASH (Magoč and Salzberg, 2011) using parameters: -m 30 -M 70 -l.  
493 Finally, variants and normalized fitness values were calculated by python script as  
494 described previously (Wang et al., 2021). Briefly, merged paired-end sequences were  
495 firstly parsed by SeqIO module in BioPython (Cock et al., 2009) and then translated into  
496 protein sequences. Reads were filtered and removed if there is no amplicon tag or the  
497 sequence length was incorrect. Afterwards, variants of each residue were counted and  
498 normalized by amplicon to generate the frequency of each mutation. The enrichment  
499 ratio of each amino acid was calculated as follows:

500

$$501 \text{enrichment}_{aa} = \frac{\text{freq}_{aa, \text{virus}}}{\text{freq}_{aa, \text{plasmid}}}$$

502

503  
504 in which  $\text{freq}_{aa, \text{virus}}$  represents the frequency of a certain amino acid in the  
505 subamplicon in the output virus population after passage;  $\text{freq}_{aa, \text{plasmid}}$  represents the  
506 frequency of the amino acid in the subamplicon in the input plasmid.

507

508 The normalized fitness scores of individual amino acid substitutions were calculated  
509 based on the enrichment ratio of the amino acid normalized by the mean enrichment  
510 ratios of silent mutations and nonsense mutations (the average of enrichment ratio for  
511 all silent mutations and nonsense mutations calculated the same way as above):

512

$$513 \text{fitness}_{aa} = \frac{\log(\text{enrichment}_{aa}) - \log(\text{enrichment}_{\text{nonsense}})}{\log(\text{enrichment}_{\text{silent}}) - \log(\text{enrichment}_{\text{nonsense}})}$$

514

515



516 in which  $enrichment_{silent}$  and  $enrichment_{nonsense}$  are the mean of the enrichment ratio  
517 of the silent mutations and the nonsense mutations across HA1 for a given sample.

518

519 Custom python scripts for analyzing the deep mutational scanning data have been  
520 deposited to <https://github.com/Wangyiquan95/HA1>

521

## 522 **Monoclonal antibody selection**

523 The saturated neutralization concentration was determined first for the selecting escape  
524 variant. Briefly,  $10^7$  TCID50 of each virus were incubated with the monoclonal antibody  
525 with different concentrations in duplicate at 37°C for 30 min to equilibrate binding. Virus-  
526 antibody complexes were incubated with MDCK cells for 1 hour at 37°C. The cells were  
527 then washed by PBS and infection medium with the same concentration of antibody  
528 was added. The virus supernatants were then collected at 16 hpi and measured the  
529 titers by TCID50 assay. The saturated neutralization was decided by where the  
530 neutralization curve reached the plateau.

531

532 The virus stocks used for selection experiments were pooled from three independent  
533 rescues. The selection experiments were carried out as the same setting above with a  
534 saturate neutralization concentration escape variants were passaged if required and  
535 harvested at 16 hpi to obtain sufficient viral load ( $>10^4$  TCID50/mL) for high quality  
536 genome sequencing. No antibody treatment control groups were passaged in parallel.  
537 Viral RNA was extracted (QIAamp Viral RNA Kits, QIAGEN) from the supernatants and  
538 served as the template for RT-PCR (SuperScript III, ThermoFisher Scientific; Phusion  
539 High-Fidelity DNA Polymerase, ThermoFisher Scientific). For RT reaction, 10  $\mu$ L of viral  
540 RNA and 1  $\mu$ L MBTUni-12 primer (5'-ACG CGT GAT CAG CAA AAG CAG G-3') was  
541 added into a 20  $\mu$ L reaction. 10  $\mu$ L cDNA template was amplified with MBTUni-12 and  
542 MBTUni-13 (5'-ACG CGT GAT CAG TAG AAA CAA GG-3') primers and an annealing  
543 temperature at 57°C for 25 cycles. The input templates in PCR were normalized by the  
544 NP genome equivalents determined by qPCR. The PCR products were purified  
545 (PureLink Quick Gel Extraction Kit, ThermoFisher Scientific) and used to generate the  
546 shotgun library (KAPA HyperPrep Kits, Roche) and then sequenced one MiSeq flowcell  
547 for 251 cycles using a MiSeq 500-cycle sequencing kit version 2. The DeepSNV  
548 pipeline (Gerstung et al., 2012, 2014) was used to identify minor sequence variants. 2%  
549 minimum frequency threshold was set for variant calling.

550

## 551 **Biolayer interferometry (BLI)**

552 The virus stocks used for BLI were purified by ultra-centrifugation as stated above. The  
553 protein concentration of the virus stock was determined by Bradford assay (Pierce™  
554 Coomassie Plus (Bradford) Assay Kit, ThermoFisher Scientific). Streptavidin sensors  
555 (ForteBio) were coated with 500 nM 3'-SLN-PEG3-biotin (3'-Sialyllactosamine-PEG3-  
556 Biotin (Single Arm), Sussex Research). Equal concentrations of each virus were run on  
557 the BLI detection system (octet RED96e, ForteBio) for association for 300 seconds in  
558 the presence of 10  $\mu$ M zanamivir to inhibit NA activity. Sensors were then incubated in  
559 PBS with zanamivir for 300 seconds for dissociation.

560

## 561 **Acknowledgements**

562 This work has been generously supported by the National Institute of Allergy and  
563 Infectious Diseases of the National Institutes of Health under awards K22AI116588 and  
564 R01AI139246 to CBB, R00AI139445 and R01AI167910 to NCW, the Roy J. Carver  
565 Charitable Trust under award 17-4905 to CBB, and startup funds from the University of  
566 Illinois.

567

## 568 **References**

569 Bloom, J.D., Labthavikul, S.T., Otey, C.R., and Arnold, F.H. (2006). Protein stability promotes  
570 evolvability. *Proceedings of the National Academy of Sciences of the United States of America*  
571 *103*, 5869–5874. <https://doi.org/10.1073/pnas.0510098103>.

572 Bloom, J.D., Gong, L.I., and Baltimore, D. (2010). Permissive secondary mutations enable the  
573 evolution of influenza oseltamivir resistance. *Science* *328*, 1272–1275.  
574 <https://doi.org/10.1126/science.1187816>.

575 Brooke, C.B. (2017). Population Diversity and Collective Interactions during Influenza Virus  
576 Infection. *J. Virol.* *91*. <https://doi.org/10.1128/JVI.01164-17>.

577 Brooke, C.B., Ince, W.L., Wei, J., Bennink, J.R., and Yewdell, J.W. (2014). Influenza A virus  
578 nucleoprotein selectively decreases neuraminidase gene-segment packaging while enhancing  
579 viral fitness and transmissibility. *Proc. Natl. Acad. Sci. U.S.A.* *111*, 16854–16859.  
580 <https://doi.org/10.1073/pnas.1415396111>.

581 Brown, E.G., Liu, H., Kit, L.C., Baird, S., and Nesrallah, M. (2001). Pattern of mutation in the  
582 genome of influenza A virus on adaptation to increased virulence in the mouse lung:  
583 Identification of functional themes. *Proceedings of the National Academy of Sciences* *98*, 6883–  
584 6888. <https://doi.org/10.1073/pnas.111165798>.

585 Carrat, F., and Flahault, A. (2007). Influenza vaccine: The challenge of antigenic drift. *Vaccine*  
586 <https://doi.org/10.1016/j.vaccine.2007.07.027>.

587 Caton, A.J., Brownlee, G.G., Yewdell, J.W., and Gerhard, W. (1982). The antigenic structure of  
588 the influenza virus A/PR/8/34 hemagglutinin (H1 subtype). *Cell* *31*, 417–427. .

589 Cock, P.J.A., Antao, T., Chang, J.T., Chapman, B.A., Cox, C.J., Dalke, A., Friedberg, I.,  
590 Hamelryck, T., Kauff, F., Wilczynski, B., et al. (2009). Biopython: freely available Python tools  
591 for computational molecular biology and bioinformatics. *Bioinformatics* *25*, 1422–1423.  
592 <https://doi.org/10.1093/bioinformatics/btp163>.

593 Das, S.R., Hensley, S.E., Ince, W.L., Brooke, C.B., Subba, A., Delboy, M.G., Russ, G., Gibbs,  
594 J.S., Bennink, J.R., and Yewdell, J.W. (2013). Defining influenza A virus hemagglutinin  
595 antigenic drift by sequential monoclonal antibody selection. *Cell Host Microbe* *13*, 314–323.  
596 <https://doi.org/10.1016/j.chom.2013.02.008>.

597 Doud, M.B., and Bloom, J.D. (2016). Accurate measurement of the effects of all amino-acid  
598 mutations on influenza hemagglutinin. *Viruses* *8*, 155. <https://doi.org/10.3390/v8060155>.

- 599 Doud, M.B., Hensley, S.E., and Bloom, J.D. (2017). Complete mapping of viral escape from  
600 neutralizing antibodies. *PLoS Pathog.* *13*, e1006271.  
601 <https://doi.org/10.1371/journal.ppat.1006271>.
- 602 Draghi, J.A., Parsons, T.L., Wagner, G.P., and Plotkin, J.B. (2010). Mutational robustness can  
603 facilitate adaptation. *Nature* *463*, 353–355. <https://doi.org/10.1038/nature08694>.
- 604 Elena, S.F. (2012). RNA virus genetic robustness: possible causes and some consequences.  
605 *Curr Opin Virol* *2*, 525–530. <https://doi.org/10.1016/j.coviro.2012.06.008>.
- 606 Fowler, D.M., and Fields, S. (2014). Deep mutational scanning: a new style of protein science.  
607 *Nat Methods* *11*, 801–807. <https://doi.org/10.1038/nmeth.3027>.
- 608 Fraczkiewicz, R., and Braun, W. Exact and Efficient Analytical Calculation of the Accessible  
609 Surface Areas and Their Gradients for Macromolecules. *Journal of Computational Chemistry*  
610 *19*, 15. .
- 611 Gaymard, A., Le Briand, N., Frobort, E., Lina, B., and Escuret, V. (2016). Functional balance  
612 between neuraminidase and haemagglutinin in influenza viruses. *Clinical Microbiology and*  
613 *Infection* *22*, 975–983. <https://doi.org/10.1016/j.cmi.2016.07.007>.
- 614 Gerstung, M., Beisel, C., Rechsteiner, M., Wild, P., Schraml, P., Moch, H., and Beerenwinkel, N.  
615 (2012). Reliable detection of subclonal single-nucleotide variants in tumour cell populations.  
616 *Nature Communications* *3*, 1–8. <https://doi.org/10.1038/ncomms1814>.
- 617 Gerstung, M., Papaemmanuil, E., and Campbell, P.J. (2014). Subclonal variant calling with  
618 multiple samples and prior knowledge. *Bioinformatics* *30*, 1198–1204.  
619 <https://doi.org/10.1093/bioinformatics/btt750>.
- 620 Harris, A., Cardone, G., Winkler, D.C., Heymann, J.B., Brecher, M., White, J.M., and Steven,  
621 A.C. (2006). Influenza virus pleiomorphy characterized by cryoelectron tomography.  
622 *Proceedings of the National Academy of Sciences* *103*, 19123–19127.  
623 <https://doi.org/10.1073/pnas.0607614103>.
- 624 Hensley, S.E., Das, S.R., Bailey, A.L., Schmidt, L.M., Hickman, H.D., Jayaraman, A.,  
625 Viswanathan, K., Raman, R., Sasisekharan, R., Bennink, J.R., et al. (2009). Hemagglutinin  
626 receptor binding avidity drives influenza A virus antigenic drift. *Science* *326*, 734–736.  
627 <https://doi.org/10.1126/science.1178258>.
- 628 Hensley, S.E., Das, S.R., Gibbs, J.S., Bailey, A.L., and Schmidt, L.M. (2011). Influenza A Virus  
629 Hemagglutinin Antibody Escape Promotes Neuraminidase Antigenic Variation and Drug  
630 Resistance. *PLoS ONE* *6*, 15190. <https://doi.org/10.1371/journal.pone.0015190>.
- 631 Ives, J.A.L., Carr, J.A., Mendel, D.B., Tai, C.Y., Lambkin, R., Kelly, L., Oxford, J.S., Hayden,  
632 F.G., and Roberts, N.A. (2002). The H274Y mutation in the influenza A/H1N1 neuraminidase  
633 active site following oseltamivir phosphate treatment leave virus severely compromised both in  
634 vitro and in vivo. *Antiviral Research* *55*, 307–317. [https://doi.org/10.1016/S0166-](https://doi.org/10.1016/S0166-3542(02)00053-0)  
635 [3542\(02\)00053-0](https://doi.org/10.1016/S0166-3542(02)00053-0).

- 636 Koel, B.F., Burke, D.F., Bestebroer, T.M., van der Vliet, S., Zondag, G.C.M., Vervaet, G.,  
637 Skepner, E., Lewis, N.S., Spronken, M.I.J., Russell, C.A., et al. (2013). Substitutions near the  
638 receptor binding site determine major antigenic change during influenza virus evolution. *Science*  
639 *342*, 976–979. <https://doi.org/10.1126/science.1244730>.
- 640 Koelle, K., and Rasmussen, D.A. (2015). The effects of a deleterious mutation load on patterns  
641 of influenza A/H3N2's antigenic evolution in humans. *ELife* *4*.  
642 <https://doi.org/10.7554/eLife.07361>.
- 643 Kosik, I., and Yewdell, J.W. (2019). Influenza Hemagglutinin and Neuraminidase: Yin(-)Yang  
644 Proteins Coevolving to Thwart Immunity. *Viruses* *11*. <https://doi.org/10.3390/v11040346>.
- 645 Kosik, I., Ince, W.L., Gentles, L.E., Oler, A.J., Kosikova, M., Angel, M., Magadán, J.G., Xie, H.,  
646 Brooke, C.B., and Yewdell, J.W. (2018). Influenza A virus hemagglutinin glycosylation  
647 compensates for antibody escape fitness costs. *PLoS Pathog.* *14*, e1006796.  
648 <https://doi.org/10.1371/journal.ppat.1006796>.
- 649 Kryazhimskiy, S., Dushoff, J., Bazykin, G.A., and Plotkin, J.B. (2011). Prevalence of epistasis in  
650 the evolution of influenza A surface proteins. *PLoS Genetics* *7*, e1001301.  
651 <https://doi.org/10.1371/journal.pgen.1001301>.
- 652 Lauring, A.S., Frydman, J., and Andino, R. (2013). The role of mutational robustness in RNA  
653 virus evolution. *Nature Reviews Microbiology* *2013* *11:5* *11*, 327–336.  
654 <https://doi.org/10.1038/nrmicro3003>.
- 655 Lee, J.M., Huddleston, J., Doud, M.B., Hooper, K.A., Wu, N.C., Bedford, T., and Bloom, J.D.  
656 (2018). Deep mutational scanning of hemagglutinin helps predict evolutionary fates of human  
657 H3N2 influenza variants. *Proceedings of the National Academy of Sciences of the United States*  
658 *of America* *115*, E8276–E8285. <https://doi.org/10.1073/pnas.1806133115>.
- 659 Magoč, T., and Salzberg, S.L. (2011). FLASH: fast length adjustment of short reads to improve  
660 genome assemblies. *Bioinformatics* *27*, 2957–2963.  
661 <https://doi.org/10.1093/bioinformatics/btr507>.
- 662 Martin, M. (2011). Cutadapt removes adapter sequences from high-throughput sequencing  
663 reads. *EMBnet.Journal* *17*, 10–12. <https://doi.org/10.14806/ej.17.1.200>.
- 664 McBride, R.C., Ogbunugafor, C.B., and Turner, P.E. (2008). Robustness promotes evolvability  
665 of thermotolerance in an RNA virus. *BMC Evol Biol* *8*, 231. [https://doi.org/10.1186/1471-2148-8-  
666 \*231\*.](https://doi.org/10.1186/1471-2148-8-231)
- 667 Michael Vahey, A.D., and Fletcher Correspondence, D.A. (2019). Low-Fidelity Assembly of  
668 Influenza A Virus Promotes Escape from Host Cells. *Cell* *176*, 281–294.  
669 <https://doi.org/10.1016/j.cell.2018.10.056>.
- 670 Mitnaul, L.J., Matrosovich, M.N., Castrucci, M.R., Tuzikov, A.B., Bovin, N.V., Kobasa, D., and  
671 Kawaoka, Y. (2000). Balanced hemagglutinin and neuraminidase activities are critical for  
672 efficient replication of influenza A virus. *J. Virol.* *74*, 6015–6020. .

- 673 Mölder, F., Jablonski, K.P., Letcher, B., Hall, M.B., Tomkins-Tinch, C.H., Sochat, V., Forster, J.,  
674 Lee, S., Twardziok, S.O., Kanitz, A., et al. (2021). Sustainable data analysis with Snakemake.  
675 <https://doi.org/10.12688/f1000research.29032.2>.
- 676 Paget, J., Spreeuwenberg, P., Charu, V., Taylor, R.J., Iuliano, A.D., Bresee, J., Simonsen, L.,  
677 and Viboud, C. (2019). Global mortality associated with seasonal influenza epidemics: New  
678 burden estimates and predictors from the GLaMOR Project. *Journal of Global Health* 9.  
679 <https://doi.org/10.7189/jogh.09.020421>.
- 680 Pauly, M.D., Procario, M.C., and Luring, A.S. (2017). A novel twelve class fluctuation test  
681 reveals higher than expected mutation rates for influenza A viruses. *ELife* 6.  
682 <https://doi.org/10.7554/eLife.26437>.
- 683 Petrova, V.N., and Russell, C.A. (2018). The evolution of seasonal influenza viruses. *Nat Rev*  
684 *Microbiol* 16, 47–60. <https://doi.org/10.1038/nrmicro.2017.118>.
- 685 Putri, W.C.W.S., Muscatello, D.J., Stockwell, M.S., and Newall, A.T. (2018). Economic burden  
686 of seasonal influenza in the United States. *Vaccine* 36, 3960–3966.  
687 <https://doi.org/10.1016/j.vaccine.2018.05.057>.
- 688 Sanjuan, R. (2010). Mutational fitness effects in RNA and single-stranded DNA viruses:  
689 common patterns revealed by site-directed mutagenesis studies. *Philosophical Transactions of*  
690 *the Royal Society B: Biological Sciences* 365, 1975–1982.  
691 <https://doi.org/10.1098/rstb.2010.0063>.
- 692 Sanjuan, R., Moya, A., and Elena, S.F. (2004). The distribution of fitness effects caused by  
693 single-nucleotide substitutions in an RNA virus. *Proceedings of the National Academy of*  
694 *Sciences* 101, 8396–8401. <https://doi.org/10.1073/pnas.0400146101>.
- 695 Strobel, H.M., Horwitz, E.K., and Meyer, J.R. (2022). Viral protein instability enhances host-  
696 range evolvability. *PLOS Genetics* 18, e1010030. <https://doi.org/10.1371/journal.pgen.1010030>.
- 697 Tzarum, N., de Vries, R.P., Peng, W., Thompson, A.J., Bouwman, K., McBride, R., Yu, W., Zhu,  
698 X., Verheije, M.H., Paulson, J.C., et al. (2017). The 150-loop restricts the host specificity of  
699 human H10N8 influenza virus. *Cell Rep* 19, 235–245.  
700 <https://doi.org/10.1016/j.celrep.2017.03.054>.
- 701 Vahey, M.D., and Fletcher, D.A. (2019). Influenza a virus surface proteins are organized to help  
702 penetrate host mucus. *ELife* 8. <https://doi.org/10.7554/eLife.43764>.
- 703 Visher, E., Whitefield, S.E., McCrone, J.T., Fitzsimmons, W., and Luring, A.S. (2016). The  
704 Mutational Robustness of Influenza A Virus. *PLoS Pathog.* 12, e1005856.  
705 <https://doi.org/10.1371/journal.ppat.1005856>.
- 706 de Visser, J.A.G.M., Hermisson, J., Wagner, G.P., Ancel Meyers, L., Bagheri-Chaichian, H.,  
707 Blanchard, J.L., Chao, L., Cheverud, J.M., Elena, S.F., Fontana, W., et al. (2003). Perspective:  
708 Evolution and detection of genetic robustness. *Evolution* 57, 1959–1972. .



- 709 de Vries, E., Du, W., Guo, H., and de Haan, C.A.M. (2020). Influenza A Virus Hemagglutinin–  
710 Neuraminidase–Receptor Balance: Preserving Virus Motility. *Trends in Microbiology* *28*, 57–67.  
711 <https://doi.org/10.1016/j.tim.2019.08.010>.
- 712 Wagner, R., Matrosovich, M., and Klenk, H.-D. (2002). Functional balance between  
713 haemagglutinin and neuraminidase in influenza virus infections. *Rev. Med. Virol.* *12*, 159–166.  
714 <https://doi.org/10.1002/rmv.352>.
- 715 Wang, Y., Lei, R., Nourmohammad, A., and Wu, N.C. (2021). Antigenic evolution of human  
716 influenza H3N2 neuraminidase is constrained by charge balancing. *ELife* *10*, e72516.  
717 <https://doi.org/10.7554/eLife.72516>.
- 718 Wasilewski, S., Calder, L.J., Grant, T., and Rosenthal, P.B. (2012). Distribution of surface  
719 glycoproteins on influenza A virus determined by electron cryotomography. *Vaccine* *30*, 7368–  
720 7373. <https://doi.org/10.1016/j.vaccine.2012.09.082>.
- 721 Wu, N.C., and Wilson, I.A. (2017). A Perspective on the Structural and Functional Constraints  
722 for Immune Evasion: Insights from Influenza Virus. *Journal of Molecular Biology* *429*, 2694–  
723 2709. <https://doi.org/10.1016/j.jmb.2017.06.015>.
- 724 Wu, C., Cheng, X., Wang, X., Lv, X., Yang, F., Liu, T., Fang, S., Zhang, R., and Jinqian, C.  
725 (2013). Clinical and molecular characteristics of the 2009 pandemic influenza H1N1 infection  
726 with severe or fatal disease from 2009 to 2011 in Shenzhen, China. *Journal of Medical Virology*  
727 *85*, 405–412. <https://doi.org/10.1002/jmv.23295>.
- 728 Wu, N.C., Young, A.P., Al-Mawsawi, L.Q., Olson, C.A., Feng, J., Qi, H., Chen, S.H., Lu, I.H.,  
729 Lin, C.Y., Chin, R.G., et al. (2014). High-throughput profiling of influenza A virus hemagglutinin  
730 gene at single-nucleotide resolution. *Scientific Reports* *4*. <https://doi.org/10.1038/srep04942>.
- 731 Wu, N.C., Thompson, A.J., Xie, J., Lin, C.-W., Nycholat, C.M., Zhu, X., Lerner, R.A., Paulson,  
732 J.C., and Wilson, I.A. (2018). A complex epistatic network limits the mutational reversibility in  
733 the influenza hemagglutinin receptor-binding site. *Nat Commun* *9*, 1264.  
734 <https://doi.org/10.1038/s41467-018-03663-5>.
- 735 Xu, R., Zhu, X., McBride, R., Nycholat, C.M., Yu, W., Paulson, J.C., and Wilson, I.A. (2012a).  
736 Functional Balance of the Hemagglutinin and Neuraminidase Activities Accompanies the  
737 Emergence of the 2009 H1N1 Influenza Pandemic. *Journal of Virology* *86*, 9221–9232.  
738 <https://doi.org/10.1128/jvi.00697-12>.
- 739 Xu, R., McBride, R., Nycholat, C.M., Paulson, J.C., and Wilson, I.A. (2012b). Structural  
740 Characterization of the Hemagglutinin Receptor Specificity from the 2009 H1N1 Influenza  
741 Pandemic. *Journal of Virology* *86*, 982–990. <https://doi.org/10.1128/JVI.06322-11>.
- 742 Yewdell, J.W. (2011). Viva la revolución: rethinking influenza a virus antigenic drift. *Curr Opin*  
743 *Virol* *1*, 177–183. <https://doi.org/10.1016/j.coviro.2011.05.005>.
- 744
- 745

746 **Supplementary figures**

747

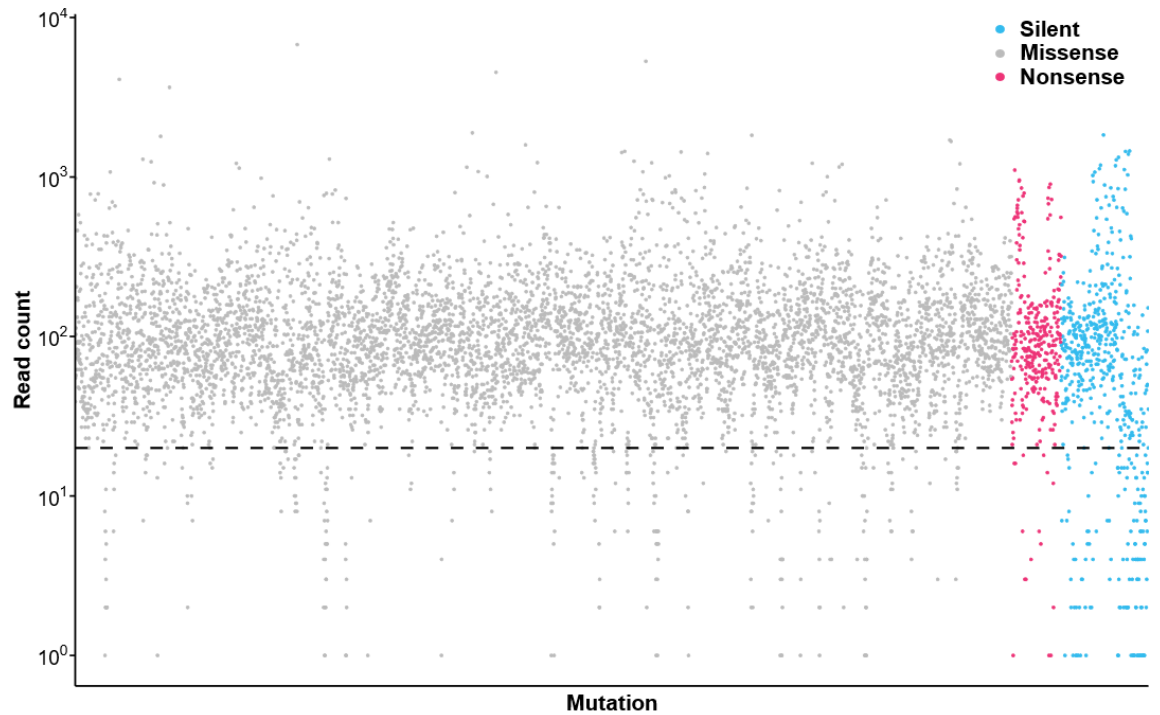

748

749 **Figure S1: Mutation coverage in DMS plasmid library.** Read count for every possible  
750 mutation (read count  $\geq 1$ ) in HA1. Dash line indicates the cutoff value ( $\geq 20$ ) for  
751 downstream analysis (6303/6825). 168 mutations had read count = 0 in the plasmid  
752 library.

753

754

755

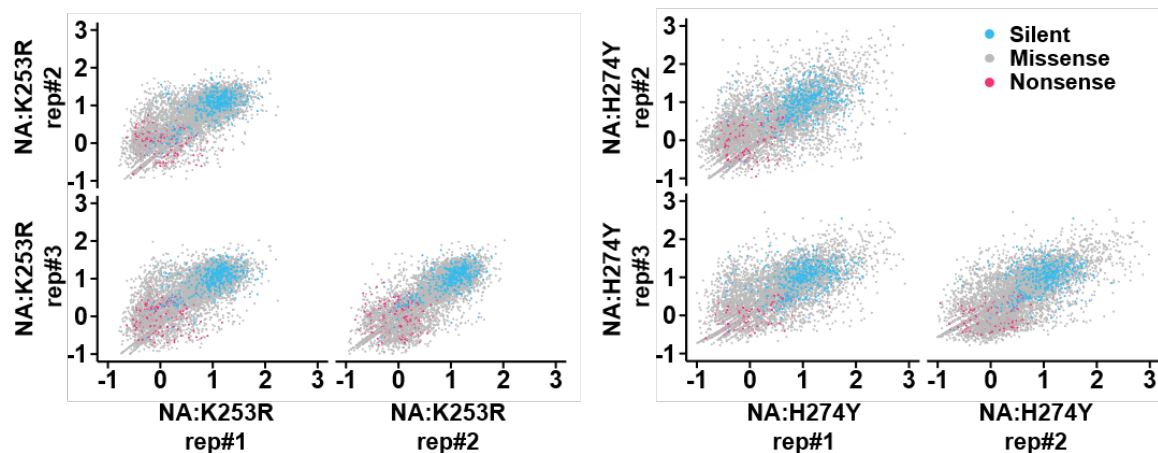

756  
757  
758  
759  
760  
761

**Figure S2: Correlation of normalized relative fitness score between replicates.** Each dot represents the normalized relative fitness score of a specific substitution in the two indicated samples. Silent, missense, and nonsense substitutions are colored as indicated in the legend.

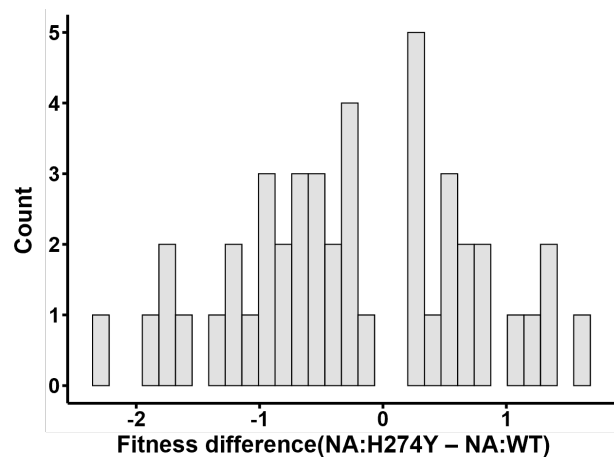

762

763

764

765

**Figure S3: Fitness difference distribution between NA:H274Y and NA:WT. Data only show substitutions with differences with  $p < 0.01$  based on  $t$  test.**

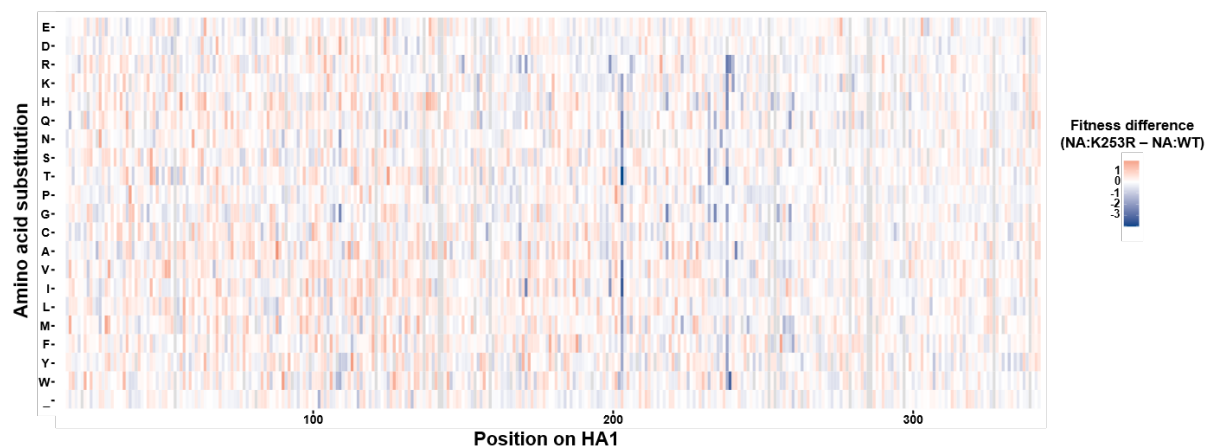

766

767 **Figure S4: Fitness difference for each mutation between NA:H274Y and NA:WT.**  
768 *Normalized relative fitness score differences between NA:WT and NA:K253R for each*  
769 *substitution at each residue in HA1 as measured through DMS. Each value generated*  
770 *by subtracting the mean fitness score of 3 replicates for each genotype. Gray indicates*  
771 *that the mutation has the insufficient coverage in the plasmid library. The numbering*  
772 *was based on the H1 starting from the initiating methionine.*



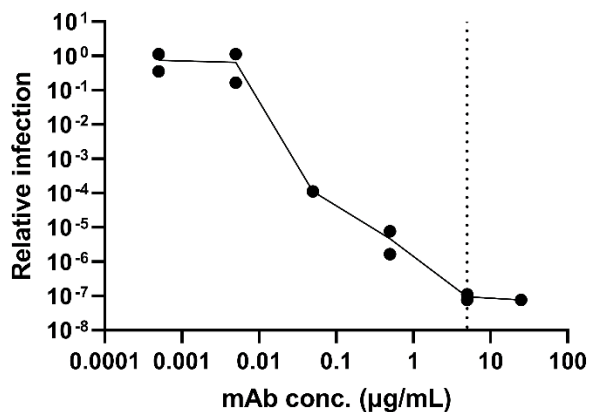

773

774 **Figure S5: Saturated neutralization concentration of H36-26.** 10<sup>7</sup> TCID<sub>50</sub> of NA:WT  
775 virus was neutralized by the given concentration of the antibody and infected a well of 6-  
776 well plate. The supernatant was collected 16 hours post infection. The output titer was  
777 measured by TCID<sub>50</sub> assay and normalized by the titer of no antibody controls. The  
778 dash line indicates the concentration used in the selection experiment.

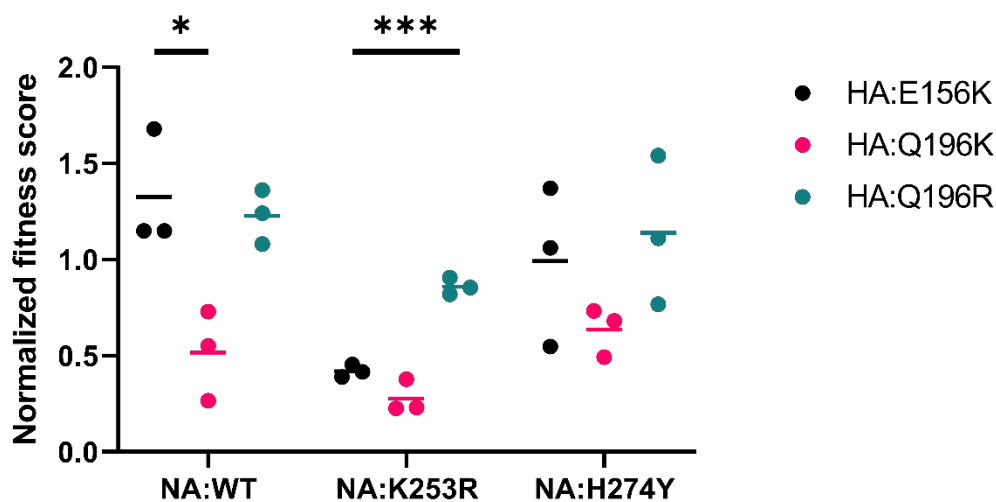

779

780 **FigureS6: Fitness effect in DMS for H36-26 escape variants.** The normalized relative  
781 fitness scores of the escape variants found in H36-26 antibody selection. \*\*\* indicates  $p$   
782  $< 0.01$  and \* indicates  $p < 0.05$ ,  $p > 0.05$  were not indicated in the graph, based on  $t$   
783 tests.

784

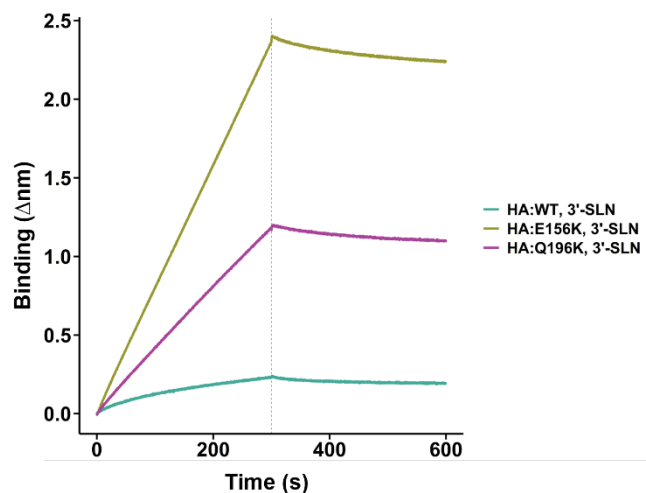

785  
786 **Figure S7: HA:E156K possesses higher receptor binding avidity.** Binding kinetics to  
787 the receptor was measured by biolayer interferometry. The input was normalized by the  
788 protein concentration of the purified virion. Streptavidin sensors were coated with 3'-  
789 SLN-PEG3-biotin (3'-Sialyllactosamine-PEG3-Biotin (Single Arm)). Separated by the  
790 dashed line, the first 300 seconds was the association period of the virion to the  
791 receptor, the next 300 seconds showed the dissociation period. 10  $\mu$ M zanamivir was  
792 present during the assay to inhibit NA activity.
